# Supplementary material
Source: PubMed Central journal article supplement (PMC4648328)

## Supplementary materials

for

### **Pontin, a new mutant p53 binding protein, promotes gain of function of mutant p53**

Yuhan Zhao<sup>a</sup>, Cen Zhang<sup>a</sup>, Xuetian Yue<sup>a</sup>, Xiaoyan Li<sup>a</sup>, Juan Liu<sup>a</sup>,

Haiyang Yu<sup>a</sup>, Vladmir A. Belyi<sup>a</sup>, Qifeng Yang<sup>a</sup>, Zhaohui Feng<sup>a,1</sup>, Wenwei Hu<sup>a,1</sup>

#### **Figure legends**

##### **Supplementary Figure S1. Knockdown of Pontin has no apparent effect on mutp53 levels.**

**a. & b.** Knockdown of Pontin by siRNA slightly increased wtp53 levels in RKO p53+/+ cells but had no obvious effect on wtp53 levels in HCT116 p53+/+ cells, whereas knockdown of Pontin had no obvious effect on mutp53 levels in SK-BR-3, HCT116 p53<sup>R248W/-</sup> and H1299-R175H cells. The levels of p53 in these cells were determined at both protein (**a**) and mRNA (**b**, lower panel) levels by Western blot assays and Taqman real-time PCR, respectively. The mRNA expression levels were normalized to actin. The knockdown of Pontin was confirmed at both protein (**a**) and mRNA (**b**, upper panel) levels. Data are presented as mean±SD (n=3).

##### **Supplementary Figure S2. Knockdown of Pontin decreases mutp53 GOF in migration and invasion in Saos2 cells.**

**a.** Knockdown of Pontin by siRNA inhibited migration of Saos2-R175H but not p53-null Saos2-Con cells as determined by transwell assays. Left panel: representative images. Right panel: quantification of average number of migrated cells/field (200× magnification). Two different siRNA oligos were used and very similar results were obtained. For the sake of clarity, results from one siRNA were presented. **b.** Knockdown of Pontin decreased invasion of Saos2-R175H

cells but not H1299-Con cells as determined by transwell assays in chambers coated with matrigel. **c.** The knockdown of Pontin in Soas2 cells was confirmed at both mRNA (left panel) and protein (right panel) levels by Taqman real-time PCR and Western blot assays, respectively. For **a-c**, data were presented as mean $\pm$ SD (n=3).

**Supplementary Figure S3. The knockdown of Pontin in both H1299 and SK-BR-3 cells.**

**a. & b.** The knockdown of Pontin was confirmed in H1299 (**a**) and SK-BR-3 cells (**b**) at both RNA and protein levels by Taqman real-time PCR and Western blot assays, respectively. Data are presented as mean $\pm$ SD (n=3).

**Supplementary Figure S4. Knockdown of Pontin by siRNA decreases mutp53 GOF in migration in H1299 cells with expression of different mutations in the p53 gene.**

**a. & b.** Knockdown of Pontin by siRNA inhibited migration of H1299 cells with expression of different mutations in the *p53* gene (R175H, R248Q and R273H) but not H1299-Con cell as determined by transwell assays. **a.** representative images; **b.** quantification of average number of migrated cells/field (200 $\times$  magnification). Data are presented as mean $\pm$ SD (n=3). Two siRNA oligos against Pontin were used and similar results were obtained. For the sake of clarity, results from one siRNA were presented. **c.** The knockdown of Pontin was confirmed at the protein level by Western blot assays.

**Supplementary Figure S5. H1299-Con and H1299-R175H cells with or without knockdown of Pontin display similar cell viability, apoptosis and cell cycle distribution.**

**a.** Cell viability was measured by the trypan blue exclusion method in a Vi-CELL cell counter.

**b.** Apoptosis was measured by Annexin V staining followed by the analysis in a flow cytometry.

**c.** Cell cycle distribution was measured by propidium iodide staining in a flow cytometry. Cells were transfected with control siRNA or siRNA against Pontin, and cell viability, apoptosis and cell cycle distribution were analyzed at 24 h after transfection. No obvious difference in cell viability, apoptosis and cell cycle distribution was observed among these cells. Data are presented as mean±SD (n=3).

**Supplementary Table S1. Fold induction of gene expression by mutp53 in SK-BR-3 cells with or without knockdown of Pontin**

A. The list of genes whose expression levels were induced by mutp53 in SK-BR-3 cells transfected with control siRNA

| GENE                      | siRNA    |         | Descriptions                                                               |
|---------------------------|----------|---------|----------------------------------------------------------------------------|
|                           | Con      | Pontin  |                                                                            |
| STMN1                     | 2.598602 | -1.7202 | stathmin 1                                                                 |
| SUZ12P1                   | 2.511845 | -0.6896 | suppressor of zeste 12 homolog pseudogene 1                                |
| DGKZ                      | 1.512386 | -1.6886 | diacylglycerol kinase, zeta                                                |
| TPD52                     | 1.174993 | -1.0156 | tumor protein D52                                                          |
| SNN                       | 1.584963 | -0.5251 | stannin                                                                    |
| ZBTB7C                    | 3.090386 | 1.36457 | zinc finger and BTB domain containing 7C                                   |
| TMEM234                   | 1.447459 | -0.1605 | transmembrane protein 234                                                  |
| BMS1P5                    | 1.017278 | -0.507  | BMS1 pseudogene 5                                                          |
| FUBP1                     | 1.068172 | -0.4414 | far upstream element (FUSE) binding protein 1                              |
| EIF2S2                    | 1.164924 | -0.284  | eukaryotic translation initiation factor 2, subunit 2 beta, 38kDa          |
| C15orf62                  | 1.17358  | -0.2655 | chromosome 15 open reading frame 62                                        |
| ZNF37BP                   | 1.602211 | 0.16361 | zinc finger protein 37B, pseudogene                                        |
| CYP2A6 (includes others)  | 1.089637 | -0.3188 | cytochrome P450, family 2, subfamily A, polypeptide 6                      |
| PPDPF                     | 1.207671 | -0.1874 | pancreatic progenitor cell differentiation and proliferation factor        |
| GOLGA8J (includes others) | 1.126532 | -0.2096 | golgin A8 family, member H                                                 |
| BUB1                      | 1.056235 | -0.2648 | budding uninhibited by benzimidazoles 1 homolog (yeast)                    |
| RRN3P1                    | 1.081428 | -0.2059 | RNA polymerase I transcription factor homolog (S. cerevisiae) pseudogene 1 |
| CEP89                     | 1.009003 | -0.2256 | centrosomal protein 89kDa                                                  |
| ERI3                      | 1.757023 | 0.54299 | ERI1 exoribonuclease family member 3                                       |
| ADRB1                     | 1.773354 | 0.57608 | adrenoceptor beta 1                                                        |
| ATP11B                    | 1.347923 | 0.17769 | ATPase, class VI, type 11B                                                 |
| ITPR1                     | 1.510816 | 0.42123 | inositol 1,4,5-trisphosphate receptor, type 1                              |
| RIPK1                     | 1.817959 | 0.72904 | receptor (TNFRSF)-interacting serine-threonine kinase 1                    |
| NEAT1                     | 1.004819 | -0.0758 | nuclear paraspeckle assembly transcript 1 (non-protein coding)             |
| AKT2                      | 1.031413 | -0.0477 | v-akt murine thymoma viral oncogene homolog 2                              |
| CTBP2                     | 1.431515 | 0.39562 | C-terminal binding protein 2                                               |
| LOC100506098              | 1.312414 | 0.31242 | uncharacterized LOC100506098                                               |
| UNC13D                    | 1.121991 | 0.14248 | unc-13 homolog D (C. elegans)                                              |
| TET2                      | 1.246915 | 0.28929 | tet methylcytosine dioxygenase 2                                           |
| PAXBP1                    | 1.020974 | 0.16695 | PAX3 and PAX7 binding protein 1                                            |
| SH3BGR                    | 1.236803 | 0.44072 | SH3 domain binding glutamate-rich protein                                  |
| BCL11B                    | 1.963621 | 1.23342 | B-cell CLL/lymphoma 11B (zinc finger protein)                              |
| KDM5C                     | 1.135    | 0.4073  | lysine (K)-specific demethylase 5C                                         |

|                           |          |         |                                                                                         |
|---------------------------|----------|---------|-----------------------------------------------------------------------------------------|
| HBE1                      | 1.202274 | 0.50756 | hemoglobin, epsilon 1                                                                   |
| AZGP1                     | 1.201634 | 0.53407 | alpha-2-glycoprotein 1, zinc-binding                                                    |
| ZNF789                    | 1.204014 | 0.60373 | zinc finger protein 789                                                                 |
| HDGFRP3                   | 1.433155 | 0.83913 | hepatoma-derived growth factor, related protein 3                                       |
| P2RX5                     | 1.09508  | 0.50242 | purinergic receptor P2X, ligand-gated ion channel, 5                                    |
| ELF5                      | 1.319843 | 0.74066 | E74-like factor 5 (ets domain transcription factor)                                     |
| MUCL1                     | 1.027481 | 0.50602 | mucin-like 1                                                                            |
| HLA-A                     | 1.280154 | 0.79316 | major histocompatibility complex, class I, A                                            |
| STS                       | 1.299498 | 0.84314 | steroid sulfatase (microsomal), isozyme S                                               |
| GPR125                    | 1.256973 | 0.82508 | G protein-coupled receptor 125                                                          |
| SLC16A10                  | 1.70044  | 1.30644 | solute carrier family 16 (aromatic amino acid transporter), member 10                   |
| TP53                      | 1.309104 | 0.96376 | tumor protein p53                                                                       |
| CLEC7A                    | 1.052659 | 0.72035 | C-type lectin domain family 7, member A                                                 |
| PEG10                     | 1.139974 | 0.87972 | paternally expressed 10                                                                 |
| PPM1K                     | 1.105006 | 0.91634 | protein phosphatase, Mg <sup>2+</sup> /Mn <sup>2+</sup> dependent, 1K                   |
| TRGC2                     | 1.078263 | 0.90116 | T cell receptor gamma constant 2                                                        |
| PIP                       | 2.124855 | 1.97742 | prolactin-induced protein                                                               |
| MPHOSPH6                  | 1.058268 | 0.91626 | M-phase phosphoprotein 6                                                                |
| SLC39A8                   | 1.073483 | 0.93897 | solute carrier family 39 (zinc transporter), member 8                                   |
| TARP                      | 1.102845 | 1.00973 | TCR gamma alternate reading frame protein                                               |
| C3orf70                   | 1.240597 | 1.20961 | chromosome 3 open reading frame 70                                                      |
| TNIK                      | 1.058666 | 1.05223 | TRAF2 and NCK interacting kinase                                                        |
| CYP4Z1                    | 1.147569 | 1.16237 | cytochrome P450, family 4, subfamily Z, polypeptide 1                                   |
| PRKAR2B                   | 1.177436 | 1.23146 | protein kinase, cAMP-dependent, regulatory, type II, beta                               |
| LEPREL1                   | 1.40064  | 1.49424 | leprecan-like 1                                                                         |
| PITHD1                    | 1.498393 | 1.59458 | PITH (C-terminal proteasome-interacting domain of thioredoxin-like) domain containing 1 |
| PLEKHG4B                  | 1.21018  | 1.32297 | pleckstrin homology domain containing, family G (with RhoGef domain) member 4B          |
| CYP4X1                    | 1.099864 | 1.22799 | cytochrome P450, family 4, subfamily X, polypeptide 1                                   |
| OLFM4                     | 1.851463 | 2.01304 | olfactomedin 4                                                                          |
| TOX3                      | 3.743805 | 3.90956 | TOX high mobility group box family member 3                                             |
| DPYD                      | 1.084831 | 1.28716 | dihydropyrimidine dehydrogenase                                                         |
| NLGN4X                    | 1.222392 | 1.55427 | neuroligin 4, X-linked                                                                  |
| TRIB2                     | 1.087732 | 1.66423 | tribbles pseudokinase 2                                                                 |
| UI-H-BI3-akx-g-10-0-UI.s1 | 1.30028  | 1.89423 | UI-H-BI3-akx-g-10-0-UI.s1 NCI_CGAP_Sub5 Homo sapiens cDNA clone IMAGE:2735827 3         |

B. The list of genes whose expression levels were reduced by mutp53 in SK-BR-3 cells transfected with control siRNA

| GENE       | siRNA    |         | Descriptions                                                                      |
|------------|----------|---------|-----------------------------------------------------------------------------------|
|            | Con      | Pontin  |                                                                                   |
| ALAS2      | -1.33686 | -0.1411 | aminolevulinate, delta-, synthase 2                                               |
| PPARA      | -1.00227 | 0.14225 | peroxisome proliferator-activated receptor alpha                                  |
| GCNT2      | -1.02633 | 0.02596 | glucosaminyl (N-acetyl) transferase 2, I-branching enzyme (I blood group)         |
| TMEM184C   | -1.09058 | -0.0522 | transmembrane protein 184C                                                        |
| TM56e09.x1 | -1.03395 | 0       | tm56e09.x1 NCI_CGAP_Kid11 Homo sapiens cDNA clone IMAGE:2162152 3-, mRNA sequence |
| HMG5       | -1.07141 | -0.1198 | high mobility group nucleosome binding domain 5                                   |
| NOTCH1     | -1.23836 | -0.3934 | notch 1                                                                           |
| BBS10      | -1.08032 | -0.2745 | Bardet-Biedl syndrome 10                                                          |
| TGFBI      | -1.02913 | -0.2446 | transforming growth factor, beta-induced, 68kDa                                   |
| PACSIN3    | -1.00145 | -0.3144 | protein kinase C and casein kinase substrate in neurons 3                         |
| NT5E       | -1.2046  | -0.5211 | 5'-nucleotidase, ecto (CD73)                                                      |
| RPL35P8    | -1.03186 | -0.5502 | ribosomal protein L35 pseudogene 8                                                |
| COL5A2     | -1.00748 | -0.5743 | collagen, type V, alpha 2                                                         |
| H19        | -1.39523 | -0.9811 | H19, imprinted maternally expressed transcript (non-protein coding)               |
| IGFBP7     | -1.157   | -0.7805 | insulin-like growth factor binding protein 7                                      |
| BMP2       | -1.13263 | -0.7743 | bone morphogenetic protein receptor, type II (serine/threonine kinase)            |
| AQP3       | -1.10782 | -0.753  | aquaporin 3 (Gill blood group)                                                    |
| CDK11A     | -1.20796 | -0.9021 | cell division cycle 2-like 1 (PITSLRE proteins)                                   |
| SCIN       | -1.1778  | -0.9057 | scinderin                                                                         |
| MGP        | -2.00251 | -1.7437 | matrix Gla protein                                                                |
| EGLN3      | -1.00683 | -0.8273 | egl-9 family hypoxia-inducible factor 3                                           |
| CTGF       | -1.24154 | -1.0672 | connective tissue growth factor                                                   |
| HDAC8      | -1.09092 | -0.9603 | histone deacetylase 8                                                             |
| CDCP1      | -1.017   | -0.8935 | CUB domain containing protein 1                                                   |
| MB2        | -5.05284 | -4.9769 | Homo sapiens metastasis related protein (MB2) mRNA, partial cds                   |
| CX3CL1     | -1.12598 | -1.0584 | chemokine (C-X3-C motif) ligand 1                                                 |
| KIAA0284   | -1.09295 | -1.1166 | Homo sapiens multiple myeloma susceptibility mRNA sequence                        |
| DERP12     | -3.70194 | -3.7806 | Homo sapiens mRNA for DERP12 (dermal papilla derived protein 12)                  |
| IGFBP3     | -2.24917 | -2.4846 | insulin-like growth factor binding protein 3                                      |
| YA61P      | -4.34653 | -4.7053 | Homo sapiens gastric-associated differentially-expressed protein YA61P (YA61)     |
| BASP1      | -1.13129 | -1.7479 | brain abundant, membrane attached signal protein 1                                |

Fold induction of each gene by mutp53 was calculated as expression levels in SK-BR-3-Consh cells compared with SK-BR-3-p53sh cells.

**Supplementary Table S2. Sequences of the primer sets used for amplifying p53 fragments**

| <b>p53 fragments</b>                 | <b>Primer sequences</b>                                                                            |
|--------------------------------------|----------------------------------------------------------------------------------------------------|
| Site mutagenesis for R175H mutation  | F: 5'-GAG GTT GTG AGG CAC TGC CCC CAC CAT-3'                                                       |
|                                      | R: 5'- ATG GTG GGG GCA GTG CCT CAC AAC CTC-3'                                                      |
| p53 DBD (aa 93-325)                  | F: 5'-GCG AAT TCA CCA TGG GCT ACC CAT ACG ATG TTC CAG<br>ATT ACG CTC TGT CAT CTT CTG TCC CTT-3'    |
|                                      | R: 5'-GCG AAT TCT CAT CCA TCC AGT GGT TTC TT-3'                                                    |
| $\Delta$ p53 DBD ( $\Delta$ 101-300) | F1: 5'-GCG AAT TCA CCA TGG GCT ACC CAT ACG ATG TTC CAG<br>ATT ACG CTG AGG AGC CGC AGT CAG ATC C-3' |
|                                      | R1: 5'-CTT AGT GCT CCC TGG CTG GGA AGG GAC AGA-3'                                                  |
|                                      | F2: 5'-TCT GTC CCT TCC CAG CCA GGG AGC ACT AAG-3'                                                  |
|                                      | R2: 5'-GAT CGA ATT CTC AGT CTG AGT CAG GCC CTT-3'                                                  |

Figure S1

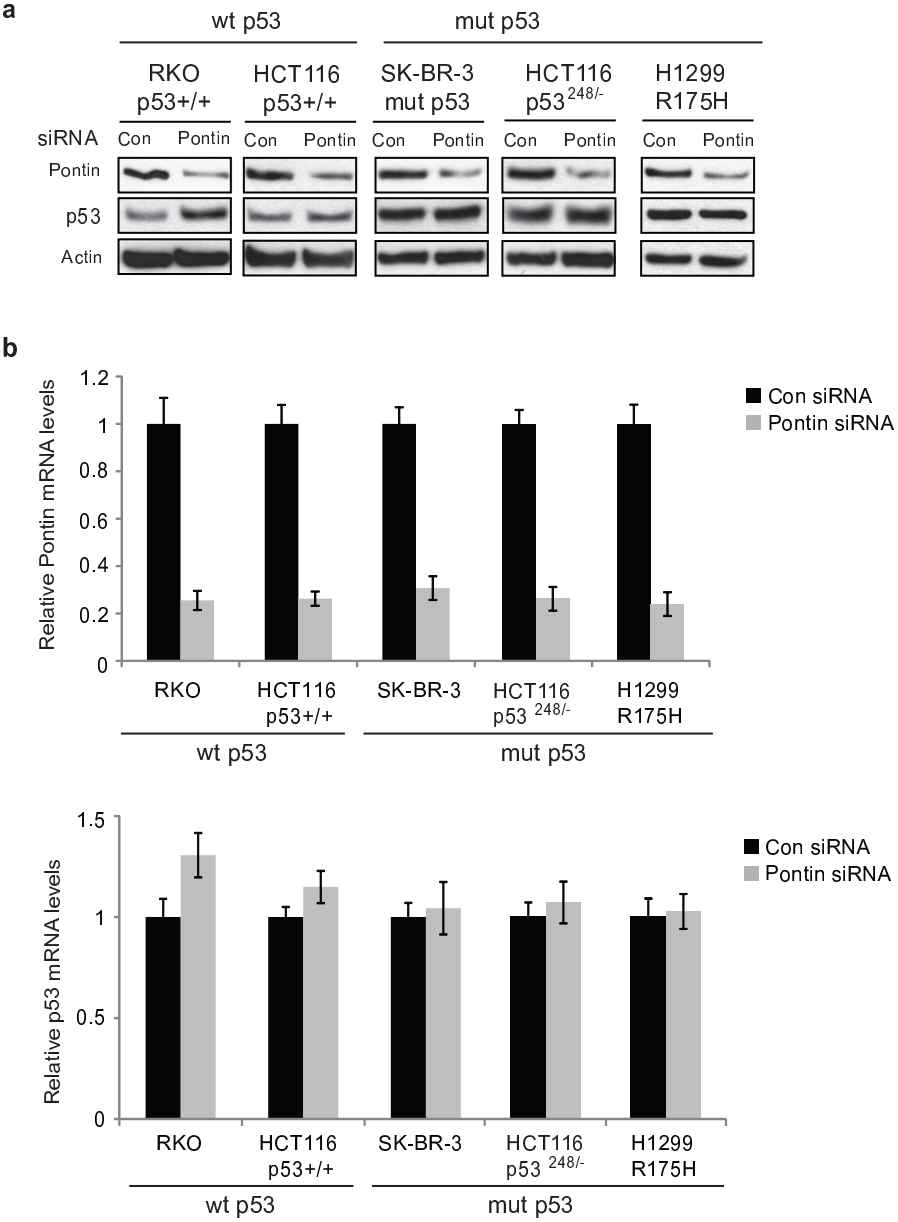



Figure S2

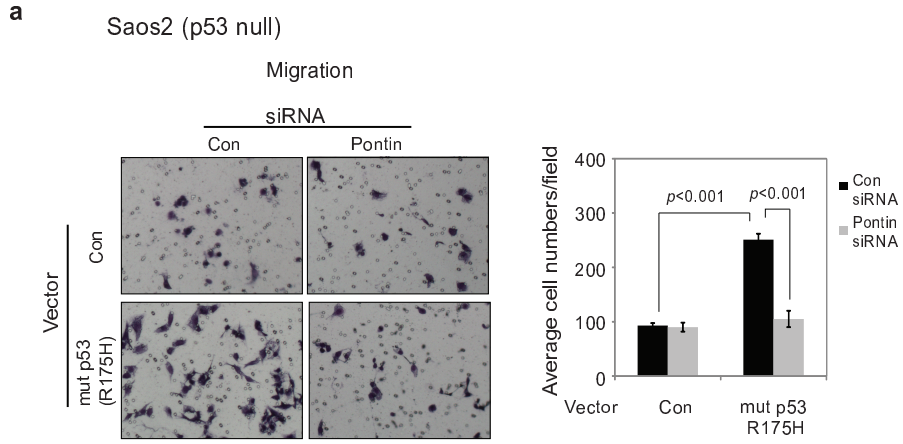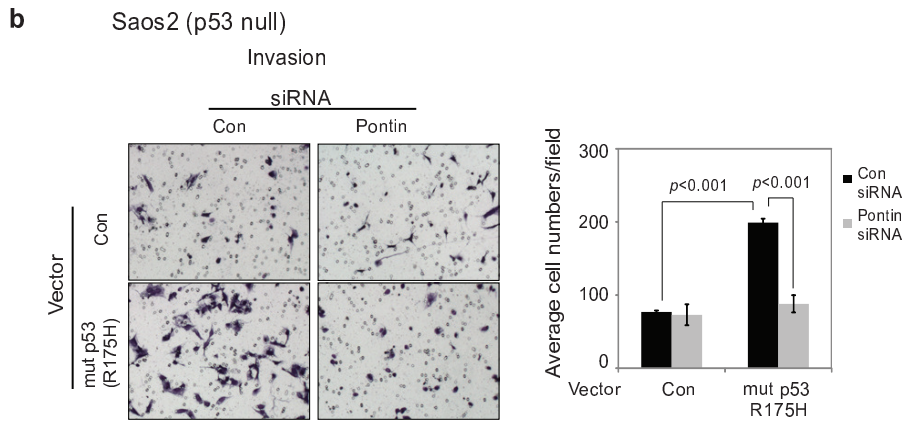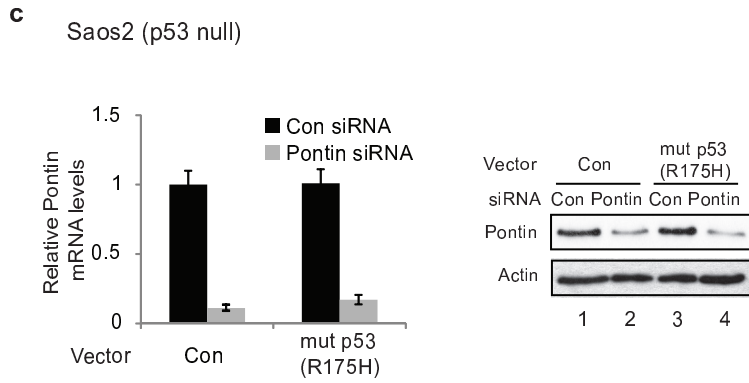

Figure S3

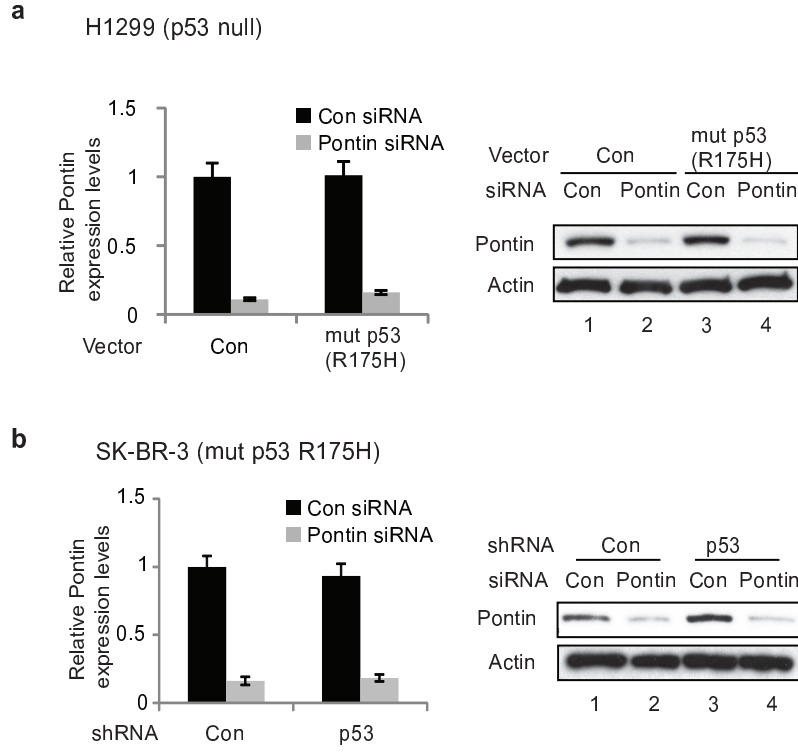

Figure S4

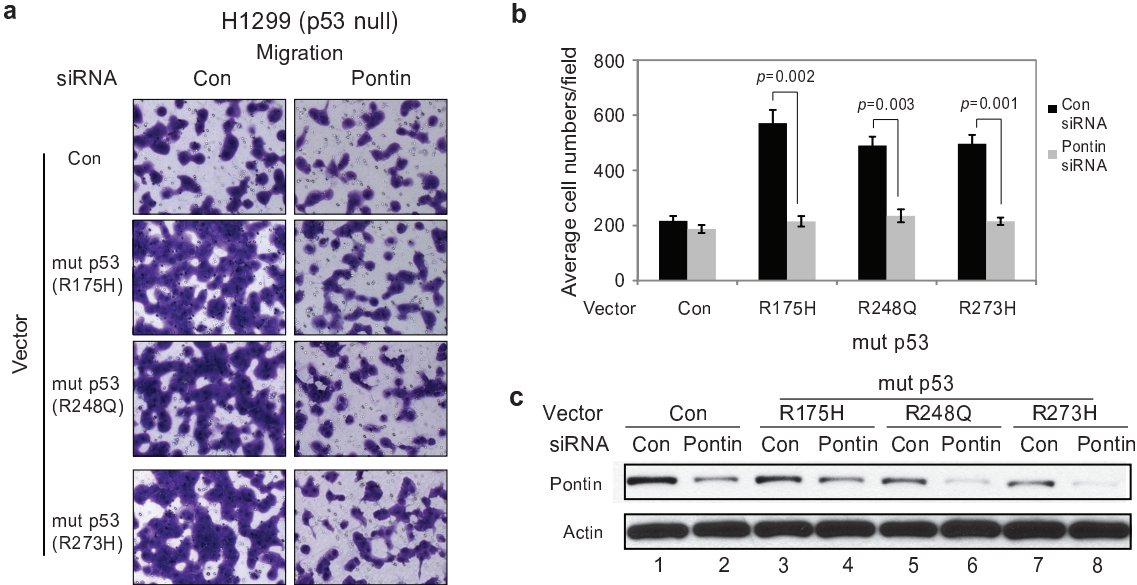

Figure S5

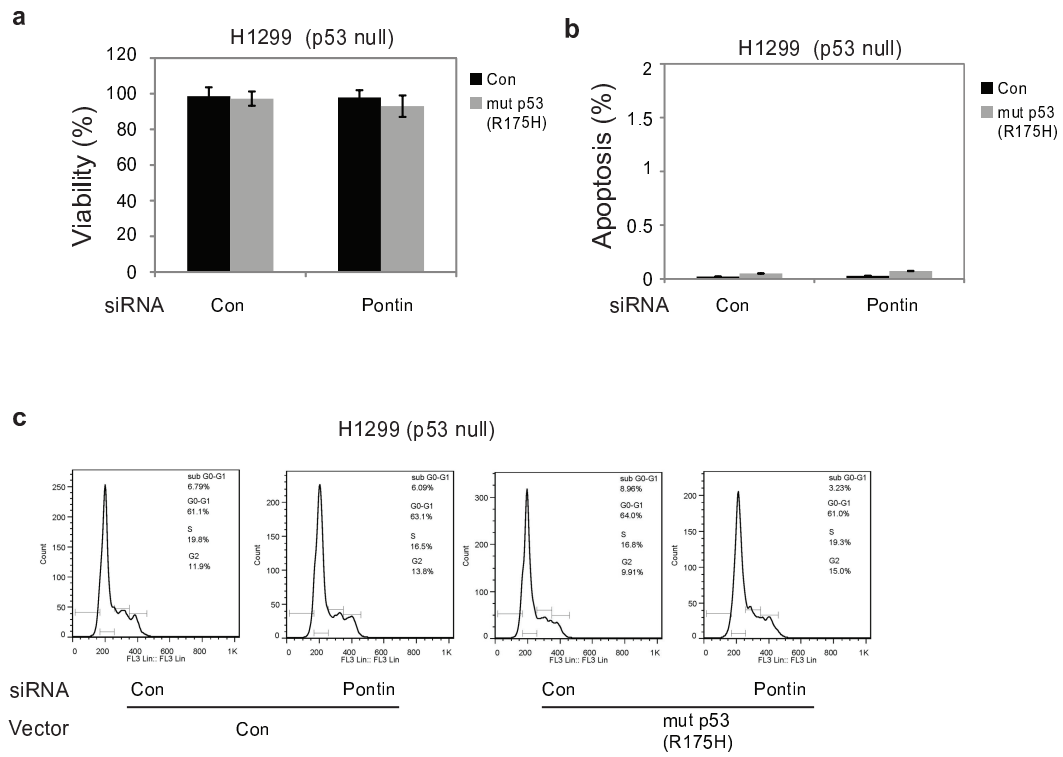

Supplement: cdd201533x1.pdf [file cdd201533x1.pdf]
